# Supplementary material for: Detection of latent fingermarks on thermal printer paper by dry contact with 1,2-indanedione
Source: Royal Society of Chemistry journal article supplement (doi:10.1039/c0ay00121j), 2010-01-01
Supplement: c0ay00121j.pdf [file c0ay00121j.pdf]

## Detection of latent fingermarks on thermal printer paper by dry contact with 1,2-indanedione

Emma L.T. Patton, David H. Brown and Simon W. Lewis\*

*Nanochemistry Research Institute, Department of Chemistry, Curtin University of Technology,  
GPO Box U1987, Perth, Western Australia 6845, Australia.*

*Fax: +61 8 9266 2300; Tel: +61 8 9266 2484; E-mail: S.Lewis@curtin.edu.au.*

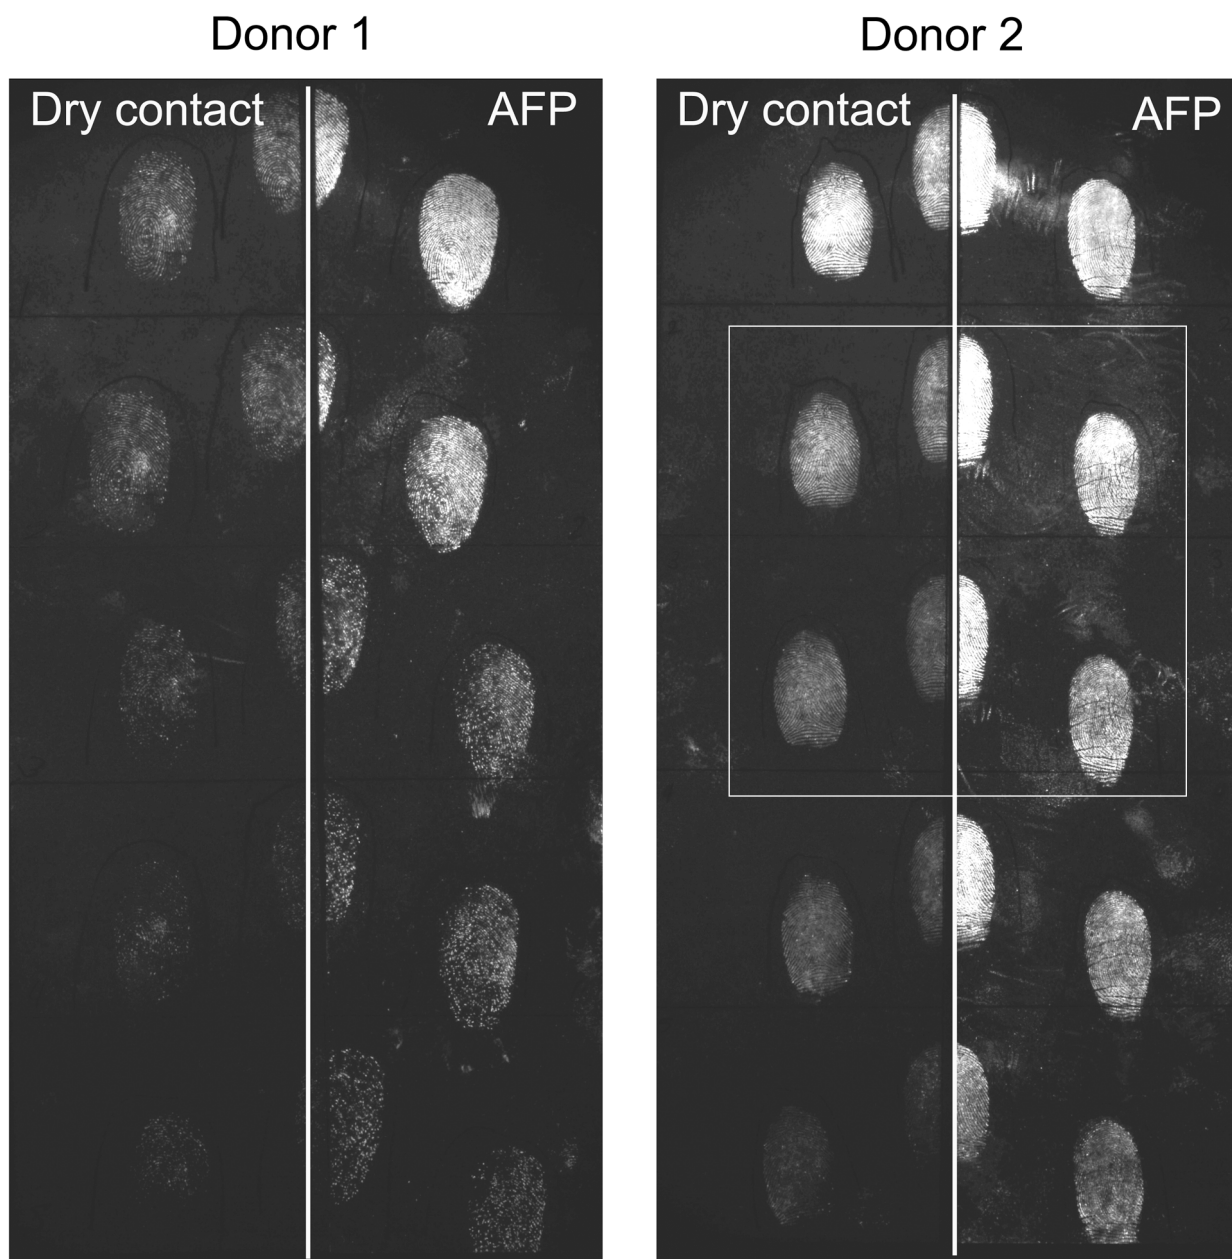

**Fig.S1** A depletion series from two donors on white photocopy paper, where halves were treated with fluoros IND/ZnCl<sub>2</sub> using the dry contact method with additional heating or the AFP method for non-thermal papers (dipping and heat treatment). Photographs taken using a Nikon D300 Camera taken in luminescence mode with settings; Focal length: 60 mm, Shutter Speed: 1/2.5 s and Aperture: f/14. The region highlighted with the box has been expanded in Figure S2.

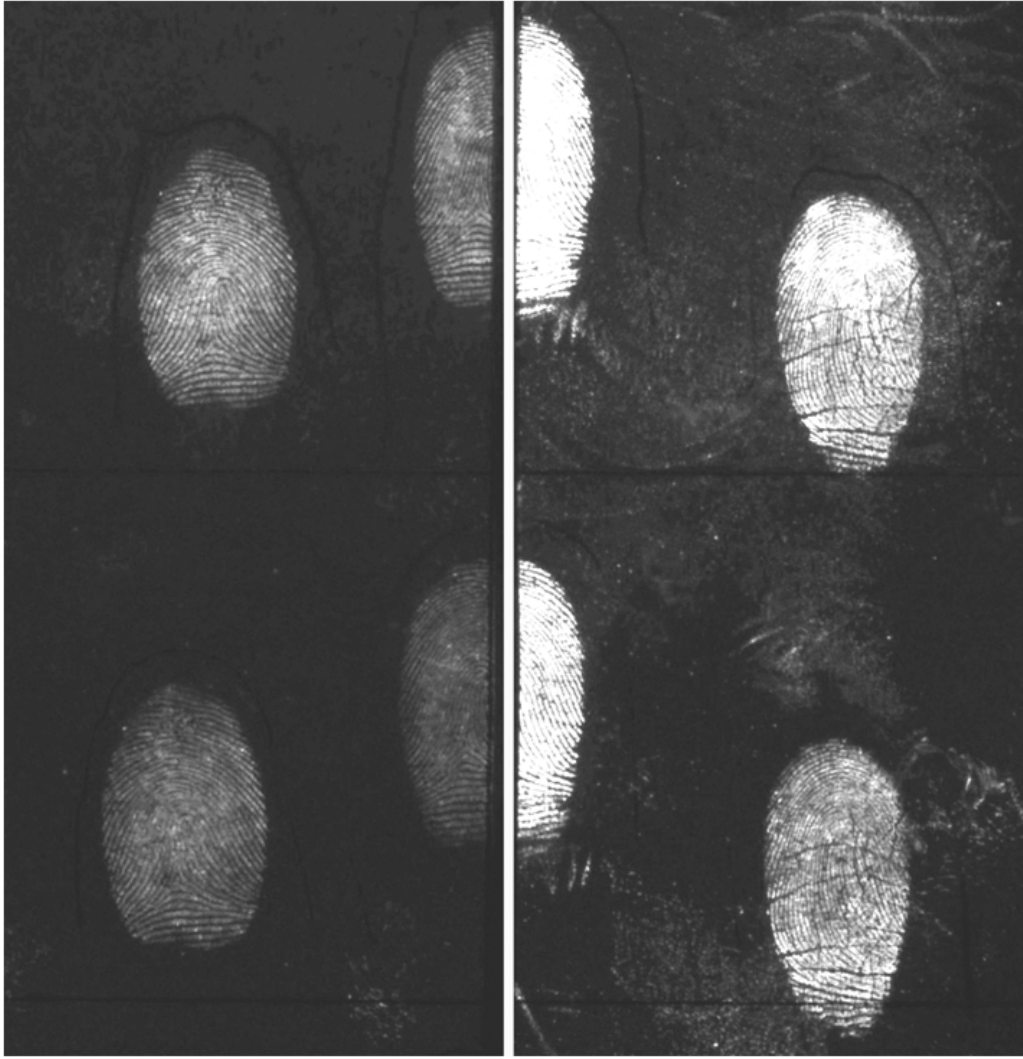

**Fig.S2** An expansion of the box in Figure S1.
